1 Title: Man against machine: Do fungal fruitbodies and eDNA give similar  
2 biodiversity assessments across broad environmental gradients?

3

4 Tobias Guldberg Frøslev\*<sup>1,2</sup>, Rasmus Kjøller<sup>1</sup>, Hans Henrik Bruun<sup>1</sup>, Rasmus  
5 Ejrnæs<sup>4</sup>, Anders Johannes Hansen<sup>2</sup>, Thomas Læssøe<sup>3</sup>, Jacob Heilmann-  
6 Clausen<sup>3</sup>

7

8 *1) Department of Biology, University of Copenhagen, Universitetsparken 15,*  
9 *DK-2100 Copenhagen Ø, Denmark, Denmark.*

10 *2) Natural History Museum of Denmark, University of Copenhagen, Øster*  
11 *Voldgade 5-7, DK-1350 Copenhagen K, Denmark.*

12 *3) Department of Biology /Natural History Museum of Denmark,*  
13 *Universitetsparken 15, DK-2100 Copenhagen Ø, Denmark, Denmark.*

14 *4) Department of Bioscience, University of Aarhus, Grenåvej 14, DK-8410*  
15 *Rønde, Denmark*

16 \*Corresponding author: [tobiasgf@snm.ku.dk](mailto:tobiasgf@snm.ku.dk)

17

## 18 **Abstract**

19 The majority of Earths biodiversity is unknown. This is particularly true for the  
20 vast part of soil biodiversity, which rarely can be observed directly.

21 Metabarcoding of DNA extracted from the environment (eDNA) has become  
22 state-of-the-art in assessing soil biodiversity. Also for fungal community  
23 profiling eDNA is seen as an attractive alternative to classical surveying based  
24 on fruitbodies. However, it is unknown whether eDNA-metabarcoding  
25 provides a representative sample of fungal diversity and census of threatened

26 species. Therefore conservation planning and assessment are still based on  
27 fruitbody inventories. Based on a dataset of unprecedented width and depth,  
28 representing both soil eDNA-metabarcoding and expert inventorying of fungal  
29 fruitbodies, we document for the first time the validity of eDNA as practical  
30 inventory method and measure of conservation value for fungi. Fruitbody data  
31 identified fewer species in total and per site, and had larger variance in site  
32 richness. Focusing on macrofungi – the class Agaricomycetes, and in turn the  
33 order Agaricales – metrics of total richness and compositional similarity  
34 converged between the methods. eDNA was suboptimal for recording the  
35 non-soil dwelling fungi.  $\beta$ -diversity was similar between methods, but more  
36 variation in community composition could be explained by environmental  
37 predictors in eDNA data. The fruitbody survey was slightly better in finding  
38 red-listed species. We find a better correspondence between biodiversity  
39 indices derived from fungal fruitbodies and DNA-based approaches than  
40 indicated in earlier studies. We argue that (historical) fungal community data  
41 based on fruitbody forays – with careful selection of taxonomic groups – may  
42 be interpreted together with modern DNA-based approaches.

43

44 **Keywords:** fungal fruitbodies, environmental DNA, metabarcoding, species  
45 richness, community composition, red-listed species, environmental gradients

46

## 47 **1. Introduction**

48

### 49 1.1 methods for inventorying fungi

50 For decades, inventory and identification of fungal fruitbodies were – together  
51 with isolation and culturing – the only way to assess fungal communities

52 (Hueck, 1953; Lange, 1948; Kjølner and Struwe, 1980; Rayner and Todd,  
53 1980; Tyler, 1985; Schmit and Lodge, 2005). Since the 1990s, these methods  
54 have been supplemented with DNA-based methods, e.g. sequencing root  
55 samples to identify mycorrhizal fungi (Gardes and Bruns, 1996; Helgason *et*  
56 *al.*, 1998) or sequencing of cloned PCR products from soil/litter samples  
57 (Schadt *et al.*, 2003; O'Brien *et al.*, 2005; Taylor *et al.* 2014) – methods that  
58 allow for a more targeted study of some compartments, but are difficult to  
59 apply to ecosystem-wide inventories of large sampling sites. More recently,  
60 massive parallel sequencing of environmental DNA (eDNA) – now known as  
61 eDNA-metabarcoding (Taberlet *et al.*, 2012) – has gained ground in studies of  
62 fungal communities (e.g. Schmidt *et al.*, 2013; Pellissier *et al.*, 2014; Tedersoo  
63 *et al.*, 2014; Barnes *et al.*, 2016), and allows for such wide inventories. . In this  
64 study we compare a thorough fruitbody inventory with eDNA-metabarcoding  
65 for ecosystem-wide inventorying of the fungal community. Fruitbody surveys  
66 and eDNA-based methods both have their strengths and limitations and may  
67 be seen as complementary, rather than competing approaches (Truong *et al.*,  
68 2017).

69

## 70 1.2 Fruitbody inventorying

71 Fruitbody surveys are low tech but laborious, requiring life-long expert  
72 taxonomic skills if thorough and reproducible data are to be achieved (Newton  
73 *et al.*, 2003). However, many fungi do not produce fruitbodies and are  
74 systematically omitted. Other taxa are likely to be under-sampled, as they are  
75 rarely fruiting, or produce very small, inconspicuous, short-lived or below-  
76 ground fruitbodies (Taylor and Finlay, 2003; Löhmus 2009; van der Linde *et*

77 *et al.*, 2012). Fruitbody formation and duration are highly influenced by (local  
78 variations in) season and weather conditions, which may hamper  
79 comparisons of sites, unless sampling is repeated over several years (Newton  
80 *et al.*, 2003; O'Dell *et al.*, 2004).

81

### 82 1.3 eDNA-metabarcoding

83 eDNA-metabarcoding is low tech when it comes to field sampling, but require  
84 high tech lab facilities and advanced post sequencing bioinformatics. It  
85 provides a broader taxonomic sample of the fungal community of not only the  
86 sexually reproducing, fruitbody forming fungi. Sampling of soil eDNA is less  
87 dependent on seasonality and climatic variation. Also, the majority of fungal  
88 biodiversity has yet to be described (Hibbett *et al.*, 2011) and a large  
89 proportion of available barcode references lack proper annotation (Hibbett *et*  
90 *al.*, 2011; Hibbett *et al.*, 2016; Nilsson *et al.*, 2016; Yahr *et al.*, 2016). This  
91 limits ecological interpretation of detected community differences in relation to  
92 guild structure, trait space or taxonomic composition. Furthermore, when  
93 sampling for eDNA only a tiny fraction of a particular site surface area can be  
94 sampled, even with an intensive design. Hence, the sample representativity  
95 depends on the heterogeneity of species distributions within habitats and the  
96 size of mycelia (Lilleskov *et al.*, 2004) – factors not easily assessed. This is a  
97 potential caveat, especially for detection of rare species – e.g. red-listed taxa  
98 – important for nature conservation (van der Linde *et al.*, 2012). Although  
99 eDNA-metabarcoding has been shown to successfully identify red-listed  
100 species (Geml *et al.*, 2014; van der Linde *et al.*, 2012), these may be more  
101 easily detected as fruitbodies, which may be targeted by trained experts over

102 large study areas in relatively short time, particularly for species with long-  
103 lived fruitbodies (e.g. perennial polypores; Runnel *et al.*, 2015).

104

#### 105 1.4 Fruitbodies versus eDNA-metabarcoding

106 Several studies detect a limited overlap in communities between fruitbody  
107 surveys and DNA-based approaches on a habitat scale (Gardes and Bruns,  
108 1996; Dahlberg *et al.*, 1997; Jonsson *et al.*, 1999; Porter *et al.*, 2008; Geml *et*  
109 *al.*, 2009; Fischer *et al.*, 2012; Baptista *et al.*, 2015). However, it remains an  
110 open question whether key community metrics nonetheless correlate along  
111 environmental gradients, so that results from either method can be used as  
112 proxy for the other. In the context of nature conservation and monitoring, it  
113 would be attractive if eDNA-metabarcoding can be proven to detect target  
114 species (e.g. red-listed species) – for which e.g. historical data of decline is  
115 known, or where monitoring programs are already running – independent of  
116 optimal fruiting seasons and availability of taxonomic expertise. Finally, it  
117 would be valuable if historical data based on fruitbody surveys hold valid  
118 information on fungal communities, and may be compared or combined with  
119 modern eDNA-metabarcoding for inferring of temporal change.

120

#### 121 1.5 Approach and expectations

122 In this study, we compare richness, community composition and community-  
123 environment relation in a large ecological space using two parallel data sets, a  
124 thorough fruitbody inventory and data obtained by eDNA-metabarcoding of  
125 soil. All data were gathered from the same 130 40x40 m sample plots in  
126 Denmark and taken over the same 2-3 year period.

127 Overall, we expected eDNA-metabarcoding to detect more species than  
128 fruitbody sampling. However, we expected the fruitbody survey to detect more  
129 red-listed species, due to the targeted survey across the whole study area  
130 and the fact that most red-listed species produce conspicuous fruitbodies. We  
131 expected eDNA-metabarcoding to provide stronger correlation with  
132 environmental gradients, due to the expected better coverage of taxonomic  
133 diversity. We expected comparability between the two approaches to be  
134 highest for community composition, and lowest for red-listed species detection,  
135 as previous studies have indicated stochastic variation in noisy data to affect  
136 richness estimates more than community composition (Abrego *et al.*, 2016;  
137 Lekberg *et al.*, 2014). Finally, we expected higher correspondence between  
138 fruitbody and eDNA-metabarcoding data, when the former were restricted to  
139 species recorded at soil level, and when both were restricted to  
140 Agaricomycetes and Agaricales.

141

## 142 **2. Materials and methods**

143

### 144 2.1 Study sites

145 130 sites of 40 × 40 m spread out across Denmark were studied. The study  
146 sites covered an ecospace spanning the major environmental gradients of  
147 terrestrial ecosystems, i.e. soil moisture, soil fertility and successional stage  
148 (Brunbjerg *et al.* 2017b). The 130 sites were selected by stratified random  
149 sampling to represent 24 environmental strata (habitat types). Six habitat  
150 types were cultivated: three types of fields (rotational, grass leys, set aside)  
151 and three types of forest plantations (beech, oak, spruce). The remaining 18

152 strata were natural habitat types, constituting all factorial combinations of:  
153 fertile and infertile; dry, moist and wet; open, tall herb/scrub and forest. We  
154 replicated these 24 strata in each of five geographical regions across  
155 Denmark. We further included a subset of 10 perceived biodiversity hotspots,  
156 two within each region. This study was part of the Danish biodiversity study,  
157 Biowide, and an elaborate description of design and data collection is  
158 available in Brunbjerg et al. (2017a).

159

## 160 2.2 Fruitbody survey

161 Each site was visited twice during the main fungal fruiting season in 2014  
162 (August - early September and October - early November) and once during  
163 the main fruiting season in 2015 (late August - October), focussing on all  
164 groups of Basidiomycota and Ascomycota, but excluding non-stromatic  
165 Pyrenomycetes and Discomycetes with fruitbodies regularly smaller than 1  
166 mm. Most woody debris was turned over to locate e.g. corticioid fungi, but no  
167 structured attempts to find hypogeous fungi were conducted, although a few  
168 were found by chance. In sites with tall and dense herbaceous vegetation,  
169 regular inspections were carried out in kneeling position. A site visit lasted  
170 approximately 1 hour, in very open monotonous sites sometimes less, e.g. in  
171 newly ploughed arable sites. All visits were led by expert field mycologist  
172 Thomas Læssøe typically accompanied by one helper. Numerous samples  
173 were taken back to a mobile lab for immediate microscopic investigation, and  
174 more interesting or critical material was dried as voucher material and in part  
175 deposited at the fungal herbarium (C) of the National History Museum of

176 Denmark. Some specimens difficult to identify were forwarded to external  
177 experts.

178

### 179 2.3 Environmental variables

180 A complete inventory of vascular plants was done for each site. Ellenberg  
181 Indicator Values, EIV (Ellenberg *et al.*, 1991) reflect plant species' abiotic  
182 optimum and have often been used in vegetation studies to describe local  
183 conditions (Diekmann, 2003). Mean Ellenberg Indicator Values were  
184 calculated based on the plant lists for each site for the light conditions (EIV.L),  
185 soil nutrient status (EIV.N) and soil moisture (EIV.F). Ellenberg values  
186 together with measured variables (see supplementary methods) for  
187 precipitation, soil pH, soil organic matter content, soil carbon content, soil  
188 phosphorous and light were used in the models to explain community  
189 structure.

190

### 191 2.4 Sequence data

192 Soil was collected from all sites followed by DNA-extraction and sequencing  
193 with primers targeting fungi as described elsewhere (Brunbjerg *et al.*, 2017a).  
194 For each site, 81 soil samples (each sample was approximately 5 cm diam.  
195 and 15 cm depth) were collected in a virtual grid with samples 4 m apart using  
196 a simple gardening tool. For each site, a large bulk soil sample was  
197 constructed by thorough mixing of 81 single soil samples, and subjected to  
198 DNA extraction with the MoBio PowerMax kit. The fungal ITS2 region was  
199 amplified using primers gITS7 (Ihrmark *et al.*, 2012) and ITS4 (White *et al.*,  
200 1990). Libraries were MiSeq sequenced (Illumina Inc., San Diego, CA, USA),



201 at the Danish National Sequencing Centre using two 250 bp PE runs. OTU  
202 tables (species-site table) were constructed, aiming for a definition of OTUs  
203 (Operational Taxonomic Units) that approximates species level delimitation.  
204 This was achieved by an initial processing with DADA2 (Callahan *et al.*, 2016)  
205 to identify exact amplicon sequence variants including removal of chimeras,  
206 followed by ITS extraction with ITSx (Bengtsson-Palme *et al.*, 2013) and  
207 subsequent clustering with VSEARCH (Rognes *et al.*, 2016) at 98.5 % – the  
208 consensus clustering level used to delimit species hypotheses (SHs) in the  
209 UNITE database (Kõljalg *et al.*, 2014), and subsequent post-clustering  
210 curation using LULU (Frøslev *et al.*, 2017) to eliminate remaining redundant  
211 sequences. Taxonomic assignment of the OTUs was done using the 2017  
212 UNITE general FASTA release (<http://dx.doi.org/10.15156/BIO/587475>).  
213 Sequence data is available from DataDryad, and files documenting the  
214 analyses from GitHub [[Data will be made available before publication. Until  
215 then it will be available by contacting the first author]].

216

217 For the more descriptive analyses, we used full fruitbody data. For some more  
218 direct comparisons, we restricted the fruitbody data to species collected at the  
219 soil surface for a more qualified comparison, as it was evident that only a  
220 small proportion of the non-soil fungi were registered by the soil-based eDNA-  
221 metabarcoding. Furthermore both datasets were filtered to obtain two  
222 increasingly taxonomically focussed subsets – Agaricomycetes and  
223 Agaricales. eDNA-metabarcoding and fruitbody data were then assessed for  
224 correspondence in a set of biodiversity metrics. Species composition was the

225 focus of the study, and as biological abundance is difficult to assess with  
226 either method, presence/absence data was used for all analyses.

227

## 228 2.5 Overlap between methods

229 The frequency of each species/OTU across the 130 sites was assessed for  
230 the full datasets, and the proportion of species/OTUs recorded with both  
231 methods or only as fruitbody or OTU was assessed. As incomplete and  
232 insufficiently annotated DNA reference data exacerbate the discrepancies  
233 between fruitbody and metabarcoding data, some focussed analyses were  
234 performed on only the species recorded with both methods ('coinciding  
235 species').

236

## 237 2.6 Species richness and sampling effort

238 OTU richness was not greatly influenced by sequencing depth, Spearman  
239 rank  $r = 0.98$  between OTU count based on rarefied data (10,000 reads per  
240 sample) and full data, and OTU richness measures were thus estimated from  
241 the full (not rarefied) data. Species accumulation was assessed for all  
242 datasets, and the variation of the recorded site richness per site was  
243 assessed by calculation of the relative standard deviation of richness for each  
244 method. Pearson correlation was used to test for correspondence between  
245 estimates of species richness and OTU richness across the 130 sites.

246

## 247 2.7 Red-listed species

248 As a measure of conservation value we used the count of red listed fungal  
249 species in the IUCN categories from near threatened to critically endangered

250 on the official Danish red list (IUCN 2012, Wind & Pihl 2010). We assessed  
251 both the total number of red-listed species identified with either method, as  
252 well as the correspondence of site wise counts of red-listed species.

253

## 254 2.9 Community composition

255 Community dissimilarity was estimated with the Sørensen dissimilarity metric  
256 using the `vegdist` function in `vegan`. Five out of the 130 sites had less than 4  
257 observed fruitbody species and were removed prior to analyses of community  
258 dissimilarity. Correlation between community dissimilarity measures based on  
259 different datasets were tested with the Mantel test (method = "pearson", 999  
260 permutations) and Procrustes test (999 permutations) using the functions in  
261 `vegan`. Community turnover along gradients (assessed as dissimilarity) was  
262 tested for correlation with environmental distance using the `bioenv` function in  
263 `vegan`. Here Sørensen distance is used for community dissimilarity and  
264 Euclidean distance for environmental dissimilarity, and we allowed up to four  
265 explanatory variables to be selected.

266

## 267 **3 Results**

268

### 269 3.1 Overlap between methods

270 The fruitbody survey recorded fewer species than the eDNA-metabarcoding  
271 approach (Fig. 1a, Supplementary Fig. 1). The fruitbody survey included  
272 8,793 observations (a species in a site), and recorded 1,751 species (1,358  
273 Agaricomycetes of which 847 belonged to Agaricales). The eDNA-  
274 metabarcoding included total 30,668 observations (an OTU in a site), and

275 recorded 8,110 OTUs (2,521 Agaricomycetes and 1,293 Agaricales). 1,288  
276 (74 %) of the fruitbody species were recorded as fruitbodies only, while 463  
277 (26 %) were found also as OTUs. 7517 (93 %) of the OTUs were found with  
278 eDNA-metabarcoding only, while 593 (7 %) were recorded also as fruitbodies  
279 (i.e. had species name annotations corresponding to the 463 species  
280 mentioned above). For these 463 coinciding species there was a tendency  
281 towards pairwise correspondence of species and OTU frequency (Fig. 1a and  
282 1c). Four coinciding species were common as fruitbodies, but rare as OTUs.  
283 Three of these (*Mycena speirea*, *Clitopilus hobsonii*, *Mollisia cinerea*) are  
284 normally observed on woody or herbaceous substrates, and the last (*Galerina*  
285 *vittiformis*) is associated with bryophytes. The top ten most frequent coinciding  
286 OTUs were less frequent as fruitbodies – all common soil fungi, except  
287 *Ganoderma applanatum*, a wood decomposer not generally perceived as a  
288 soil fungus. Community dissimilarity estimates based on the 463 coinciding  
289 species resulted in corresponding composition estimates (mantel r-statistic  
290 0.63, and 0.83 correlation in a symmetric procrustes rotation). Site OTU  
291 richness and fruitbody species richness was highly correlated when  
292 considering only the 463 coinciding species,  $r = 0.81$  with a slope close to 1  
293 (Fig. 1d).

294 394 (37%) of the 1,067 soil fruitbody species were also registered as OTUs,  
295 whereas only 69 (10%) of the 684 non-soil fruitbody species were also  
296 registered as OTUs. Per site, an average of 6.3% of the soil fruitbody species  
297 were captured as OTUs, but only 0.18% of the non-soil fruitbody species. As it  
298 was evident that the soil eDNA captured little of the non-soil funga, we made

299 comparison analyses of site richness and red-list recording both using the full  
300 fruitbody data but also on fruitbody data excluded the non-soil species.

301

### 302 3.2 Overall species richness and sampling effort

303 Although the exact logging of expenses was not part of the project, we  
304 estimate that the costs of the two approaches would be approximately equal,  
305 if repeated with the focussed aim of monitoring. The fruitbody survey included  
306 3 x 10,000 km driving, and four months of salary (three months of collecting,  
307 one month of identification) – excluding the aid from volunteers in the  
308 fruitbody survey, whereas the eDNA-metabarcoding included 10,000 km  
309 driving , approximately 6,000 USD lab consumables, and 3 months salary (1  
310 month collecting, 2 months lab work and bioinformatics). Species  
311 accumulation curves did not reach an asymptote for any of the datasets after  
312 sampling of the 130 sites (Fig. 2a). This was most pronounced for the full  
313 eDNA-metabarcoding dataset and least for the non-soil Agaricales fruitbody  
314 dataset. eDNA-metabarcoding became increasingly similar to fruitbody data  
315 with narrowed taxonomic focus. The variation in site species/OTU richness  
316 across the 130 sites was lowest for eDNA-metabarcoding, and highest for  
317 fruitbody data (markedly higher for non-soil fungi), but more similar with a  
318 narrowed taxonomic focus (Fig. 2b).

319

### 320 3.3 Richness correlation between methods.

321 Soil fruitbody species richness of the 130 study sites (Fig. 3) ranged from 0-  
322 115 (0-111 Agaricomycetes and 0-79 Agaricales), while OTU richness ranged  
323 from 66-476 (11-157 Agaricomycetes, 6-87 for Agaricales). Correlation

324 between site species richness and OTU richness (Fig. 3) was moderate for  
325 the full datasets ( $r = 0.43$ ), but strong when restricted to Agaricomycetes ( $r =$   
326  $0.64$ ) and Agaricales ( $r = 0.58$ ). Correlations became even stronger ( $r = 0.74 -$   
327  $0.81$ ) when only considering the 463 'coinciding species' – species recorded  
328 with both methods (Fig. 1d, Supplementary Fig. 1d and 1h). OTU richness  
329 based on only Agaricomycetes or Agaricales were strongly correlated with  
330 OTU richness based on the full data and ( $r = 0.74$  and  $r = 0.8$ , respectively,  
331 Supplementary Fig. 2).

332

### 333 3.4 Overall taxonomic composition

334 Taxonomic composition of eDNA-metabarcoding and fruitbody data became  
335 increasingly similar when going from full data to Agaricomycetes and  
336 Agaricales (Fig. 4, Supplementary Fig. 3, Supplementary Tables 1-4).  
337 Fruitbody data was heavily skewed towards Basidiomycota (90 %), whereas  
338 the eDNA-metabarcoding was composed of 39 % Ascomycota, 40 %  
339 Basidiomycota, and 20 % species from other phyla (Fig. 4a, Supplementary  
340 table 2). However, the relative proportions and absolute frequencies of taxa  
341 progressively converged when focussing on Agaricomycetes (Fig. 4b,  
342 Supplementary Fig. 3c) and Agaricales (Fig. 4c, Supplementary Fig. 3d). The  
343 non-soil fruitbody data was less dominated by Agaricomycetes and Agaricales  
344 than the soil-fungi data. All phyla and classes (except Dacrymycetes and  
345 Atractiellomycetes) were represented by more species/OTUs in the eDNA-  
346 metabarcoding than in the fruitbody data (Fig. 4, Supplementary Fig. 3ab). A  
347 few Agaricomycetes orders (Polyporales, Hymenochaetales, Auriculariales,  
348 Gomphales) were represented by more species in the fruitbody data than in

349 the eDNA-metabarcoding (Supplementary Fig. 3c). Almost all Agaricales  
350 genera were detected by both methods and with roughly similar species  
351 numbers.

### 352 3.5 Red-listed species

353 The soil surface fruitbody survey recorded more red-listed species than the  
354 eDNA-metabarcoding (Fig. 5, Supplementary Table 5). 100 red-listed species  
355 were recorded as fruitbodies on the soil surface (144 including the non-soil  
356 fungi), whereas 63 red-listed species were found as OTUs. 26 red-listed  
357 species were recorded with both methods, 37 red-listed species was detected  
358 as OTUs only, and 74 as fruitbodies only. Only one red-listed species from the  
359 non-soil part of the fruitbody data (*Ganoderma pfeifferi*) was also detected as  
360 OTU. When restricting the comparison of red-listed species to species present  
361 in the molecular reference database the figures for soil fruitbodies (71 species)  
362 was almost equal to the figures for OTUs (Fig. 5). When the 130 sites were  
363 grouped into categories with 0, 1-2 or 3 or more red-listed species recorded  
364 as fruitbodies or as OTUs, there was a good correspondence between the two  
365 methods (Supplementary Fig. 4).

366

### 367 3.6 Community – environment relation

368 Mantel tests showed very similar and strong correlations between community  
369 dissimilarity measures from fruitbody and eDNA-metabarcoding data, mantel  $r$   
370 = 0.67. In this case no improvements were achieved by increased taxonomic  
371 overlap (Mantel- $r$  = 0.68 and 0.62 for Agaricomycetes and Agaricales  
372 respectively), or when restricted to soil-fungi (Mantel- $r$  = 0.68, 0.71 and 0.64  
373 for full data, Agaricomycetes and Agaricales respectively). These correlations

374 were corroborated by procrustes analyses with correlation coefficients of 0.87,  
375 0.87 and 0.83, and 0.87, 0.87, 0.83 for soil-fungi for the same comparisons  
376 (all p-values < 0.01). Environmental variables explained more of the  
377 community dissimilarity for eDNA-metabarcoding data than for the survey  
378 data, and the amount of explained variation was largest for the taxonomically  
379 more inclusive datasets (Fig. 6) with the maximum explained variation for the  
380 full eDNA-metabarcoding dataset (0.66) and the lowest for the soil-fruitbody  
381 Agaricales (0.50). Adding a fourth explanatory variable did not increase the  
382 amount of explained variation for most datasets. Based on all subsets of the  
383 fruitbody data, the best three explanatory variables for community  
384 composition were mean Ellenberg soil nutrient status (EIV.N), mean Ellenberg  
385 light indicator value (EIV.L) and soil phosphorous, whereas mean Ellenberg  
386 soil nutrient status (EIV.N), mean Ellenberg soil moisture (EIV.F) and soil pH  
387 were the best for the DNA metabarcoding.

388

#### 389 4. Discussion

390 More species (OTUs) were detected by eDNA-metabarcoding than by the  
391 classic fruitbody survey. This could mainly be attributed to the detection of  
392 groups, which always go undetected in a fruitbody survey, e.g. diverse groups  
393 of moulds and yeasts. The fruitbody survey data was strongly dominated by  
394 fruitbody-forming basidiomycetes. In general, there was a relatively poor  
395 correlation for richness measures and taxonomic composition between the  
396 two full datasets, but increased strength of correlation when narrowing the  
397 focus to Agaricomycetes and subsequently to just Agaricales. Similarly,  
398 excluding wood-inhabiting and other non-soil fungi improved the



399 correspondence between the datasets, showing that these largely go  
400 undetected in soil-based eDNA sampling. The fruitbody survey identified more  
401 red-listed species, but the difference was less pronounced than anticipated,  
402 and results were almost similar when delimited to soil-dwelling fungi only.

403

#### 404 4.1 Taxonomic composition similar for macrofungi

405 The taxonomic composition was remarkably similar between eDNA-  
406 metabarcoding and fruitbody data when focussing on the Agaricomycetes,  
407 and even more pronouncedly the Agaricales. Many of the major discrepancies  
408 align with expectations – i.e. taxonomically difficult groups like *Inocybe*  
409 (Larsson et al 2009, Ryberg et al. 2008) and *Cortinarius* (Frøslev et al. 2007)  
410 were markedly more species rich as eDNA OTUs than as well-delimited  
411 species identified from fruitbodies. Approximately half of the Agaricales  
412 species recorded as fruitbodies were also found as OTUs and vice versa  
413 (Supplementary Fig. 1e). Considering the very similar proportions of  
414 Agaricales genera between the methods, it can be assumed that a large part  
415 of non-overlapping species can be explained by incomplete DNA reference  
416 data and different taxonomic concepts in handbooks for species identification  
417 of fruitbodies compared to sequence databases. An effort to expand and  
418 curate DNA reference databases is hence essential to improve future DNA-  
419 based ecological studies as already suggested by other researchers (Hibbett  
420 *et al.*, 2011; Hibbett *et al.*, 2016; Nilsson *et al.*, 2016; Yahr *et al.*, 2016).

421

#### 422 4.2 Soil DNA captures soil-fungi

423 In this study, we extracted DNA from soil samples. Although DNA from non-  
424 soil fungi may be expected to be present in the soil, it has not earlier been  
425 tested to what extend soil DNA can be used to register fungi not having their  
426 active growing life-stages within the soil, such as wood decomposing fungi.  
427 Several non-soil fungi were detected in this study, but they were observed in  
428 much fewer sites than soil-fungi when comparing to the corresponding  
429 fruitbody data. In fact, the few higher taxa that were more speciose in the  
430 fruitbody data, were primarily non-soil taxa like *Polyporales*,  
431 *Hymenochaetales*, *Crepidotus*, etc. It was, however, interesting to note that  
432 *Ganoderma applanatum* (a wood decaying polypore) was found as OTU in 51  
433 of 130 sites, including several sites with no trees, suggesting the species to  
434 be abundantly present in the spore bank. Although soil sampling catches fungi  
435 associated with above ground carbon sources, our results indicate that these  
436 are heavily undersampled. Studies indicate, that this part compose a major  
437 proportion of the total funga (Unterseher *et al.*, 2011; Arnold and Lutzoni,  
438 2007; Arnold, 2007), so to get a more complete estimate of the total fungal  
439 community, DNA-based methods will need to include sampling of above  
440 ground structures.

441

#### 442 4.3 Detection of red-listed species

443 The fruitbody survey registered more red-listed species in total and average  
444 per site. However, when adjusting for red-listed species not present in the  
445 DNA reference database (476 of the 656 Danish red-listed species were  
446 present with sequence data in UNITE), and omitting red-listed species  
447 associated with dead wood and other non-soil resources, the eDNA-

448 metabarcoding approach performed almost as good. However, the methods  
449 partly recorded different red-listed species, indicating that fruitbody surveys  
450 and eDNA-metabarcoding could be used complementarily to get a more  
451 reliable assessment of local conservation value, which to some degree  
452 conflicts with the findings of Runnel et al. (2015) that found fruitbody surveys  
453 to be superior to eDNA-based sampling of redlisted wood-inhabiting polypores  
454 at stand scale. The detection of red-listed species from environmental DNA  
455 samples must be expected to increase as sequence databases become more  
456 complete and well-annotated.

457

#### 458 4.4 Species turnover comparable

459 Our results showed that community composition estimated from DNA-  
460 metabarcoding data correlated well with estimates based on fruitbody data.  
461 This correlation did not change much after narrowing taxonomic focus to  
462 Agaricomycetes/Agaricales, indicating that all approaches are suitable for  
463 describing fungal communities and species turnover along environmental  
464 gradients. However, eDNA-metabarcoding outperformed fruitbody data when  
465 it came to correlation with environmental gradients expressed by independent  
466 environmental variables for all subsets of data. Further, it appears that the  
467 wider soil fungal community is more predictable than the fruitbody community.  
468 This could be caused by fruitbodies constituting a more stochastic subset of  
469 the total fungi, or alternatively that Agaricomycetes and Agaricales depend  
470 on less easily measured properties of the environment. Most species of  
471 Agaricomycetes and Agaricales produce billions of spores that are effectively  
472 dispersed (Peay & Bruns 2014) – which is not the case for some of the other

473 main groups of fungi in this study (Money 2016). Hence the detected  
474 community of these by eDNA may in part be a signal from the spore bank.  
475 The spore bank community has been shown to have relatively low correlation  
476 with the active community of the same taxa for pine associated  
477 ectomycorrhizal fungi (Glassman et al 2015), and thus, the lower correlation  
478 seen in our study may potentially be caused by a similar discrepancy. The  
479 lower performance of fruitbody survey data likely also indicates that fruitbody  
480 formation is more sensitive to e.g. unpredictable variation in weather  
481 conditions.  
482 As seen from the taxonomic composition the eDNA-metabarcoding has a  
483 much higher proportion of Ascomycota and other phyla of 'micro-fungi', but  
484 also a relatively lower proportion of non-soil Ascomycota and Basidiomycota.  
485 DNA-metabarcoding thus targets a community with a larger proportion of  
486 micro-fungi (possibly also due to PCR amplification biases), which must be  
487 assumed to be more dependent on soil composition and humidity, whereas  
488 the fruitbody data targets a community of macrofungi with a larger  
489 dependence on the vegetation and above ground conditions. This is reflected  
490 in light being among the best explanatory variables for the fruitbody data, and  
491 soil moisture and pH for the eDNA-metabarcoding data.

492

#### 493 4.5 Sampling efficiency/depth.

494 The results obtained in this study reflect the exact sampling protocols for  
495 both fruitbody survey and eDNA sampling, as well as the bioinformatics  
496 processing of the sequence data. The fruitbody survey included three visits to  
497 each site, and it is obvious that more sampling visits continuously will add to

498 the species list, and may be necessary to get a fully representative sample  
499 (Halme and Kotiaho, 2012; Newton *et al.*, 2003; Straatsma *et al.*, 2015) (but  
500 see Abrego *et al.* 2016). The (eDNA) soil sampling method included the  
501 mixing of 81 soil cores and thus several kilos of soil for each site, and was  
502 uniquely large compared to previous studies (e.g. Porter *et al.*, 2008; Geml *et*  
503 *al.*, 2010; Baptista *et al.*, 2015; Pellissier *et al.*, 2014; Geml *et al.*, 2009;  
504 Schmidt *et al.*, 2013). However, it still covered only 0.01 % of the soil surface  
505 of the 40 x 40 m sites, and of the approximately 5-20 kg soil sampled from  
506 each plot only 4 g of soil was used for DNA extraction. Also, we made no  
507 attempt to maximize coverage of visible variation at the sites but sampled  
508 completely systematically. Hence, both sampling approaches could be both  
509 up- and down-scaled for applications in practice. A study in Switzerland  
510 (Straatsma *et al.*, 2015) recorded fruitbodies on a weekly basis over 21 years,  
511 and identified 101 species on average per year (408 species in total) in a  
512 forest study area close to ours in size (1,500 vs 1,600 m<sup>2</sup>). Although, their  
513 total number exceeds the site average of 68 fruitbody species (and 236  
514 OTUs) in our study, their yearly average of 101 is only slightly higher than the  
515 average (93.5) of our forest/plantation sites after three 1 h visits, and we  
516 predict that it would require much further effort to get a significantly larger  
517 average species number for the fruitbody data. Presently, there is little  
518 knowledge on which parameters are most important for getting a  
519 representative sample with the eDNA-metabarcoding approach. We expect  
520 that extracting and sequencing the 81 soil cores separately or sequencing  
521 many sub-samples of the bulk sample would increase the number of detected  
522 OTUs, but this would also pose a marked increase of lab consumables and

523 processing time. As many fungal mycelia must be assumed to be restricted in  
524 size and/or time, and as our bulk sample only covers 0.01 % of the soil  
525 surface, we expect that additional bulk samples – done at the same time or at  
526 another time of the year – would be the most cost-efficient way of capturing a  
527 larger sample of the real fungal community.

528

#### 529 4.6 Practical applications

530 Both approaches represent surveys that are realistic to perform within the  
531 limits of standard surveys and research studies, and expenses were roughly  
532 comparable. For the full data, eDNA-metabarcoding resulted in more species  
533 (OTU) observations (30,668) than the fruitbody survey (8,793), whereas the  
534 numbers were more similar for Agaricomycetes (9,091 vs. 7,214) and  
535 Agaricales (4,507 vs. 4,334). In our data, fruitbody richness was a relatively  
536 weak predictor of total fungal richness as assessed with DNA metabarcoding,  
537 but was a relatively good predictor of the richness of fruitbody forming fungi  
538 (Agaricomycetes and Agaricales). This indicates that species richness of  
539 these groups may be assessed interchangeably with eDNA-metabarcoding or  
540 as fruitbodies.

541 For detection of red-listed species, eDNA-metabarcoding performed much  
542 better than expected, but still we would recommend a manual search for fruit-  
543 bodies in all cases where larger areas need to be surveyed e.g. for  
544 conservation value, as also suggested for wood-inhabiting fungi (Runnel *et al.*,  
545 2015). However, eDNA-metabarcoding may supply valuable information, in  
546 cases of poor fruiting conditions, or in more targeted plot-based monitoring  
547 programmes. Fruitbody and eDNA-metabarcoding data result in comparable

548 measures of species turnover, and thus, our results indicate that data may be  
549 combined for example to evaluate long time series including historical  
550 fruitbody data and future DNA-based surveys.

551

## 552 **Acknowledgements**

553 Karl-Henrik Larsson, Leif Örstadius and Viacheslav Spirin are thanked for  
554 identification of critical fungal collections, Anne Storgaard, Annegrete Eriksen,  
555 David Boertmann, Erik Arnfred Thomsen, Hanne Petra Katballe, Jette Anitha  
556 Hansen, Leif Wegge Laursen, Thomas Kehlet, Tom Smidth, Torbjørn Borgen  
557 are thanked for assistance in the field during fruitbody inventories. JHC  
558 acknowledge the Danish National Research Foundation for funding for the  
559 Center for Macroecology, Evolution and Climate, grant no. DNRF96.

560

## 561 **Conflicts of interest**

562 All authors declare no conflicting interests.

563

## 564 **Authors' contributions**

565 All authors designed the study, TL collected the fruitbody data, TGF collected  
566 and analyzed the molecular data, TGF carried out the statistical analyses,  
567 TGF, JHC and RK wrote first draft, all authors contributed to revising the  
568 paper.

569

570 Data Accessibility

571 Sequence data is available from DataDryad, and files documenting the  
572 analyses from GitHub. Fruitbody data is deposited in GBIF. [[more information  
573 will be added before publication]].

574

## 575 References

576 Abrego N, Halme P, Purhonen J, Ovaskainen O. (2016). Fruit body based  
577 inventories in wood-inhabiting fungi: Should we replicate in space or  
578 time? *Fungal Ecol* **20**: 225–232.

579 Arnold AE. (2007). Understanding the diversity of foliar endophytic fungi:  
580 progress, challenges, and frontiers. *Fungal Biol Rev* **21**: 51–66.

581 Arnold AE, Lutzoni F. (2007). Diversity and host range of foliar fungal  
582 endophytes: are tropical leaves biodiversity hotspots? *Ecology* **88**: 541–  
583 549.

584 Baptista P, Reis F, Pereira E, Tavares RM, Santos PM, Richard F, *et al.*  
585 (2015). Soil DNA pyrosequencing and fruitbody surveys reveal  
586 contrasting diversity for various fungal ecological guilds in chestnut  
587 orchards. *Environ Microbiol Rep* **7**: 946–954.

588 Barnes CJ, Maldonado C, Frøslev TG, Antonelli A, Rønsted N. (2016).  
589 Unexpectedly high beta-diversity of root-associated fungal communities  
590 in the Bolivian Andes. *Front Microbiol* **7**: 1–13.

591 Bengtsson-Palme J, Ryberg M, Hartmann M, Branco S, Wang Z, Godhe A, *et*  
592 *al.* (2013). Improved software detection and extraction of ITS1 and ITS2  
593 from ribosomal ITS sequences of fungi and other eukaryotes for analysis  
594 of environmental sequencing data. *Methods Ecol Evol* **4**: 914–919.

595 Brunbjerg AK, Bruun HH, Brøndum L, Classen AT, Fog K, Frøslev TG, *et al.*



- 596 (2017b). A systematic survey of regional multitaxon biodiversity:  
597 evaluating strategies and coverage. *bioRxiv*. e-pub ahead of print, doi:  
598 <http://dx.doi.org/10.1101/158030>.
- 599 Brunbjerg AK, Bruun HH, Moeslund JE, Sadler JP, Svenning JC, Ejrnæs R.  
600 (2017a). Ecospace: A unified framework for understanding variation in  
601 terrestrial biodiversity. *Basic Appl Ecol* **18**: 86-94.
- 602 Callahan BJ, McMurdie PJ, Holmes SP. (2017). Exact sequence variants  
603 should replace operational taxonomic units in marker-gene data analysis.  
604 *ISME J* **11**: 2639–2643.
- 605 Callahan BJ, McMurdie PJ, Rosen MJ, Han AW, Johnson AJA, Holmes SP.  
606 (2016). DADA2: High-resolution sample inference from Illumina amplicon  
607 data. *Nat Methods* **13**: 581–583.
- 608 Dickie IA. (2010). Insidious effects of sequencing errors on perceived diversity  
609 in molecular surveys. *New Phytol* **188**: 916–918.
- 610 Diekmann M. (2003). Species indicator values as an important tool in applied  
611 plant ecology - a review. *Basic Appl Ecol* **4**: 493–506.
- 612 Ellenberg H, Weber HE, Düll R, Wirth V, Werner W, Paulißen D. (1991).  
613 Zeigerwerte von Pflanzen in Mitteleuropa. *Scr Geobot* **18**: 1–248.
- 614 Fischer AL, Moncalvo J-M, Klironomos JN, Malcolm JR. (2012). Fruiting body  
615 and molecular rDNA sampling of fungi in woody debris from logged and  
616 unlogged boreal forests in northeastern Ontario. *Écoscience* **19**: 374–  
617 390.
- 618 Frøslev TG, Jeppesen TS, Læssøe T, Kjøller R (2007). Molecular  
619 phylogenetics and delimitation of species in *Cortinarius* section  
620 *Calochroi* (Basidiomycota, Agaricales) in Europe. *Molecular*

- 621 phylogenetics and evolution, 44(1), 217-227.
- 622 Frøslev TG, Kjøller R, Bruun HH, Ejrnæs R, Brunbjerg AK, Pietroni C, et al.  
623 (2017). Algorithm for post-clustering curation of DNA amplicon data  
624 yields reliable biodiversity estimates. *Nat Commun* **8**(1): 1188.
- 625
- 626 Gardes M, Bruns TD. (1996). Community structure of ectomycorrhizal fungi in  
627 a *Pinus muricata* forest: above- and below-ground views. *Can J Bot* **74**:  
628 1572–1583.
- 629 Geml J, Gravendeel B, Van Der Gaag KJ, Neilen M, Lammers Y, Raes N, et  
630 al. (2014). The contribution of DNA metabarcoding to fungal  
631 conservation: Diversity assessment, habitat partitioning and mapping  
632 red-listed fungi in protected coastal *Salix repens* communities in the  
633 Netherlands. *PLoS One* **9**(6): e99852.
- 634 Geml J, Laursen GA, Herriott IC, McFarland JM, Booth MG, Lennon N, et al.  
635 (2010). Phylogenetic and ecological analyses of soil and sporocarp DNA  
636 sequences reveal high diversity and strong habitat partitioning in the  
637 boreal ectomycorrhizal genus *Russula* (Russulales; Basidiomycota).  
638 *New Phytol* **187**: 494–507.
- 639 Geml J, Laursen GA, Timling I, McFarland JM, Booth MG, Lennon N, et al.  
640 (2009). Molecular phylogenetic biodiversity assessment of arctic and  
641 boreal ectomycorrhizal *Lactarius* Pers. (Russulales; Basidiomycota) in  
642 Alaska, based on soil and sporocarp DNA. *Mol Ecol* **18**: 2213–2227.
- 643 Glassman SI, Peay KG, Talbot JM, Smith DP, Chung JA, Taylor JW, ... &  
644 Bruns TD (2015). A continental view of pine-associated ectomycorrhizal  
645 fungal spore banks: a quiescent functional guild with a strong

- 646 biogeographic pattern. *New Phytologist*, 205, 1619-1631.
- 647 Halme P, Kotiaho JS. (2012). The importance of timing and number of  
648 surveys in fungal biodiversity research. *Biodivers Conserv* **21**: 205–219.
- 649 Helgason T, Daniell TJ, Husband R, Fitter AH, Young JPW. (1998). Ploughing  
650 up the wood-wide web? *Nature* **394**: 431.
- 651 Hibbett DS, Ohman A, Glotzer D, Nuhn M, Kirk P, Nilsson RH. (2011).  
652 Progress in molecular and morphological taxon discovery in Fungi and  
653 options for formal classification of environmental sequences. *Fungal Biol*  
654 *Rev* **25**: 38–47.
- 655 Hibbett D, Abarenkov K, Kõljalg U, Öpik M, Chai B, Cole J, *et al.* (2016).  
656 Sequence-based classification and identification of Fungi. *Mycologia*  
657 **108**: 1049–1068.
- 658 Hueck HJ. (1953). Myco-sociological methods of investigation. *Plant Ecol* **4**:  
659 84–101.
- 660 Ihrmark K, Bödeker ITM, Cruz-Martinez K, Friberg H, Kubartova A, Schenck J,  
661 *et al.* (2012). New primers to amplify the fungal ITS2 region - evaluation  
662 by 454-sequencing of artificial and natural communities. *FEMS Microbiol*  
663 *Ecol* **82**: 666–677.
- 664 IUCN. (2012). IUCN Red List Categories and Criteria: Version 3.1. Second  
665 edition. Gland, Switzerland and Cambridge, UK: IUCN. iv + 32pp.
- 666 Jonsson T, Kokalj S, Finlay R, Erland S. (1999). Ectomycorrhizal community  
667 structure in a limed spruce forest. *Mycol Res* **103**: 501–508.
- 668 Kjøller A, Struwe S. (1980). Microfungi of decomposing red alder leaves and  
669 their substrate utilization. *Soil Biol Biochem* **12**: 425–431.
- 670 Kõljalg U, Nilsson RH, Abarenkov K, Tedersoo L, Taylor AFS, Bahram M.

- 671 (2014). Towards a unified paradigm for sequence-based identification of  
672 fungi. *Mol Ecol* **22**: 5271–5277.
- 673 Lange M. (1948). The agarics of Maglemose: a study in the ecology of the  
674 agarics. *Dansk Bot Arkiv* **13**(1): 1-141.
- 675 Larsson E, Ryberg M, Moreau PA, Mathiesen ÅD, Jacobsson S. (2009).  
676 Taxonomy and evolutionary relationships within species of section  
677 Rimosae (Inocybe) based on ITS, LSU and mtSSU sequence data.  
678 *Persoonia*, 23, 86.
- 679 Lekberg Y, Gibbons SM, Rosendahl S. (2014). Will different OTU delineation  
680 methods change interpretation of arbuscular mycorrhizal fungal  
681 community patterns? *New Phytol* **202**: 1101–1104.
- 682 Lilleskov EA, Bruns TD, Horton TR, Taylor DL, Grogan P. (2004). Detection of  
683 forest stand-level spatial structure in ectomycorrhizal fungal communities.  
684 *FEMS Microbiol Ecol* **49**: 319–332.
- 685 van der Linde S, Holden E, Parkin PI, Alexander IJ, Anderson IC. (2012). Now  
686 you see it, now you don't: The challenge of detecting, monitoring and  
687 conserving ectomycorrhizal fungi. *Fungal Ecol* **5**: 633–640.
- 688 Lõhmus A. (2009). Factors of species-specific detectability in conservation  
689 assessments of poorly studied taxa: the case of polypore fungi. *Biol*  
690 *Conserv* **142**: 2792-2796.
- 691 Money NP. (2016) Spore Production, Discharge, and Dispersal. In:  
692 Watkinson SC, Boddy L, Money NP (eds.) *The Fungi*. Academic Press, pp.  
693 67-97.  
694

- 695 Newton AC, Davy LM, Holden E, Silverside A, Watling R, Ward SD. (2003).  
696 Status, distribution and definition of mycologically important grasslands  
697 in Scotland. *Biol Conserv* **111**: 11–23.
- 698 Nilsson RH, Wurzbacher C, Bahram M, R. M. Coimbra V, Larsson E,  
699 Tedersoo L, *et al.* (2016). Top 50 most wanted fungi. *MycoKeys* **12**: 29–  
700 40.
- 701 O'Brien HE, Parrent JL, Jackson JA, Moncalvo J, Vilgalys R. (2005). Fungal  
702 Community Analysis by Large-Scale Sequencing of Environmental  
703 Samples. *Appl Environ Microbiol* **71**: 5544–5550.
- 704 O'Dell TE, Lodge DJ, Mueller GM. (2004). Approaches to sampling  
705 macrofungi. In: Mueller GM, Bills GF, Foster MS (eds) *Biodiversity of*  
706 *Fungi: Inventory and Monitoring Methods*. Elsevier, pp 163–168.
- 707 Peay KG, Bruns TD. (2014). Spore dispersal of basidiomycete fungi at the  
708 landscape scale is driven by stochastic and deterministic processes and  
709 generates variability in plant–fungal interactions. *New Phytologist*, 204(1),  
710 180-191.
- 711 Pellissier L, Niculita-Hirzel H, Dubuis A, Pagni M, Guex N, Ndiribe C, *et al.*  
712 (2014). Soil fungal communities of grasslands are environmentally  
713 structured at a regional scale in the Alps. *Mol Ecol* **23**: 4274–4290.
- 714 Porter TM, Skillman JE, Moncalvo JM. (2008). Fruiting body and soil rDNA  
715 sampling detects complementary assemblage of Agaricomycotina  
716 (Basidiomycota, Fungi) in a hemlock-dominated forest plot in southern  
717 Ontario. *Mol Ecol* **17**: 3037–3050.
- 718 Rayner AD, Todd NK. (1980). Population and community structure and  
719 dynamics of fungi in decaying wood. *Adv Bot Res* **7**: 333–420.

- 720 Rognes T, Flouri T, Nichols B, Quince C, Mahé F. (2016). VSEARCH: a  
721 versatile open source tool for metagenomics. *PeerJ* **4**: e2584.
- 722 Runnel K, Tamm H, Lõhmus A. (2015). Surveying wood-inhabiting fungi: Most  
723 molecularly detected polypore species form fruit-bodies within short  
724 distances. *Fungal Ecol* **18**: 93–99.
- 725 Ryberg M, Nilsson RH, Kristiansson E, Töpel M, Jacobsson S, Larsson E.  
726 (2008). Mining metadata from unidentified ITS sequences in GenBank: a  
727 case study in *Inocybe* (Basidiomycota). *BMC Evolutionary Biology*, 8(1),  
728 50.
- 729 Schadt CW, Martin AP, Lipson DA, Schmidt SK. (2003). Seasonal dynamics  
730 of previously unknown fungal lineages in tundra soils. *Science* **301**:  
731 1359–1361.
- 732 Schmidt P-A, Bálint M, Greshake B, Bandow C, Römbke J, Schmitt I. (2013).  
733 Illumina metabarcoding of a soil fungal community. *Soil Biol Biochem* **65**:  
734 128–132.
- 735 Schmit JP, Lodge DJ. (2005). Classical methods and modern analysis for  
736 studying fungal diversity. In: Dighton J, White JF, Oudemans P (eds).  
737 *The Fungal Community: its Organization and Role in the Ecosystem*,  
738 *third ed.* CRC Press, pp 193–214.
- 739 Smith DP, Peay KG. (2014). Sequence depth, not PCR replication, improves  
740 ecological inference from next generation DNA sequencing. *PLoS One*  
741 **9**(2): e90234.
- 742 Straatsma G, Egli S, Straatsma G, Ayer F, Egli S. (2015). Species richness,  
743 abundance, and phenology of fungal fruit bodies over 21 years in a  
744 Swiss forest plot. *Mycol Res* **105**: 515–523.

- 745 Taberlet P, Coissac E, Pompanon F, Brochmann C, Willerslev E. (2012).  
746 Towards next-generation biodiversity assessment using DNA  
747 metabarcoding. *Mol Ecol* **21**: 2045–2050.
- 748 Taylor AFS, Finlay RD. (2003). Effects of liming and ash application on below  
749 ground ectomycorrhizal community structure in two Norway spruce  
750 forests. *Water, Air, Soil Pollut Focus* **3**: 63–76.
- 751 Taylor DL, Hollingsworth TN, McFarland JW, Lennon NJ, Nusbaum C, Ruess  
752 RW. (2014). A first comprehensive census of fungi in soil reveals both  
753 hyperdiversity and fine-scale niche partitioning. *Ecological*  
754 *Monographs* **84**(1): 3-20.
- 755 Tedersoo L, Bahram M, Põlme S, Kõljalg U, Yorou NS, Wijesundera R, *et al.*  
756 (2014). Global diversity and geography of soil fungi. *Science* **346**(6213):  
757 1256688.
- 758 Truong C, Mujic AB, Healy R, Kuhar F, Furci G, Torres D, *et al.* (2017). How  
759 to know the fungi: combining field inventories and DNA-barcoding to  
760 document fungal diversity. *New Phytol* **214**: 913–919.
- 761 Tyler G. (1985). Macrofungal flora of Swedish beech forest related to soil  
762 organic matter and acidity characteristics. *For Ecol Manage* **10**: 13–29.
- 763 Unterseher M, Jumpponen A, Öpik M, Tedersoo L, Moora M, Dormann CF, *et*  
764 *al.* (2011). Species abundance distributions and richness estimations in  
765 fungal metagenomics - Lessons learned from community ecology. *Mol*  
766 *Ecol* **20**: 275–285.
- 767 White TJ, Bruns TD, Lee SB, Taylor JW. (1990). Amplification and direct  
768 sequencing of fungal ribosomal RNA Genes for phylogenetics. In: *PCR -*  
769 *Protocols and Applications - A Laboratory Manual, Publisher: Academic*

- 770           *Press*. pp 315–322.
- 771   Wind P and Pihl S. (2010). The Danish Red List. - The National  
772           Environmental Research Institute, Aarhus University [2004].  
773           redlist.dmu.dk (updated April 2010).
- 774   Yahr R, Schoch CL, Dentinger BTM. (2016). Scaling up discovery of hidden  
775           diversity in fungi: impacts of barcoding approaches. *Philos Trans R Soc*  
776           *London B Biol Sci* **371**: 1–11.



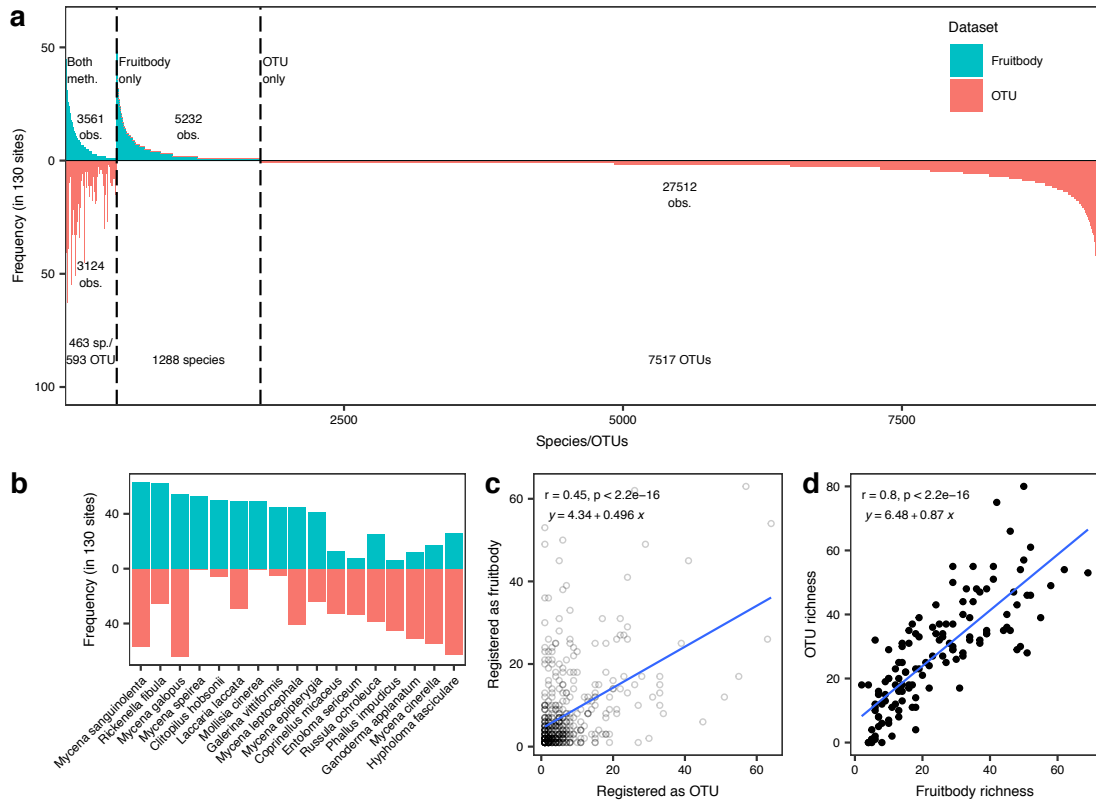

777

778 Figure 1. Frequency of species (and OTUs) among the 130 sampling sites. a) Frequency of  
 779 species sorted by decreasing frequency, and grouped by species recorded with both methods  
 780 or only as OTU or as fruitbody, y-axis indicates the number of sampling sites (of 130) in which  
 781 a species was recorded, number of species and number of observations (a species/OTU in a  
 782 site) are indicated for each group. b) Top 10 most frequent species recorded with either  
 783 method. c) scatterplot of fruitbody-based frequency vs DNA frequency of the 463 species  
 784 recorded by both methods. d) Species richness of the 130 sites as recorded with fruitbodies  
 785 or OTUs for the 463 species recorded with both methods.

786

787

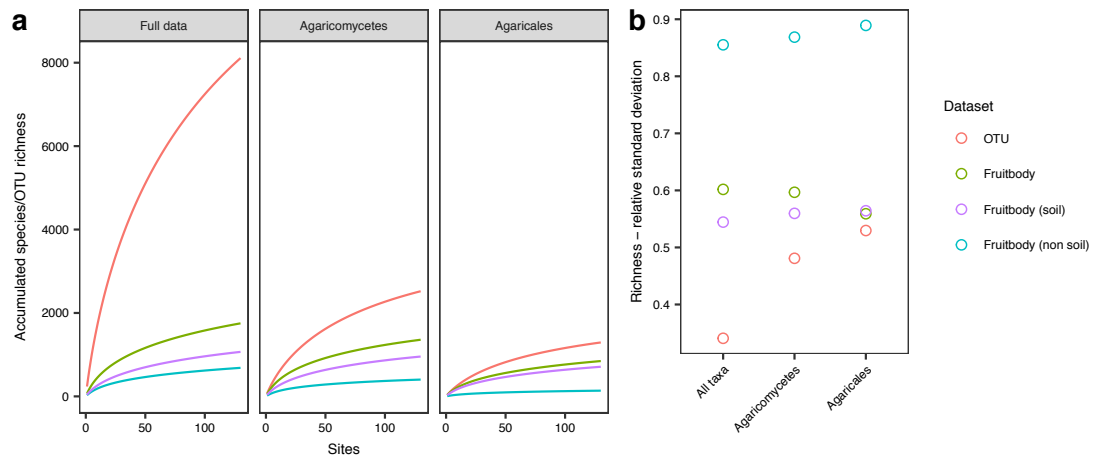

788

789 Figure 2. Sampling effort and richness variation. a) Cumulative species richness when  
790 sampling the 130 sites for the full data, Agaricomycetes and Agaricales. b) Relative standard  
791 deviation (RSD) of site species/OTU richness across the 130 sampling sites for the full data,  
792 Agaricomycetes and Agaricales.

793

794

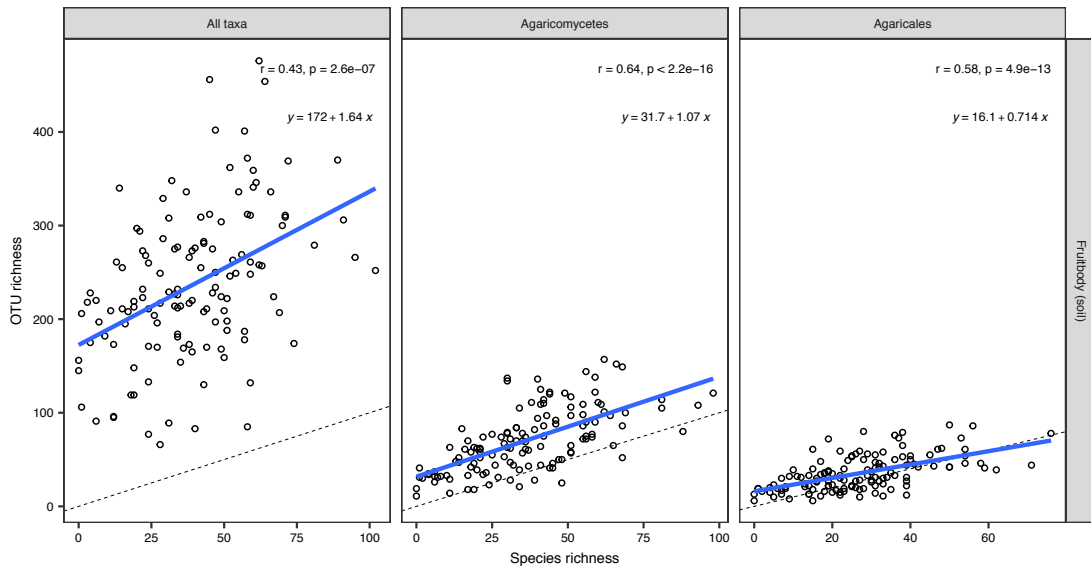

795

796 Figure 3. Correlation between site fruitbody species richness and OTU richness. Blue lines  
797 represent the linear regression of OTU richness against species richness, while the dotted  
798 line shows the identity line ( $x=y$ ). Correlations are shown for the taxonomic subsets (all taxa,  
799 Agaricomycetes, Agaricales). Fruitbody data is restricted to species registered at the soil  
800 surface.

801

802

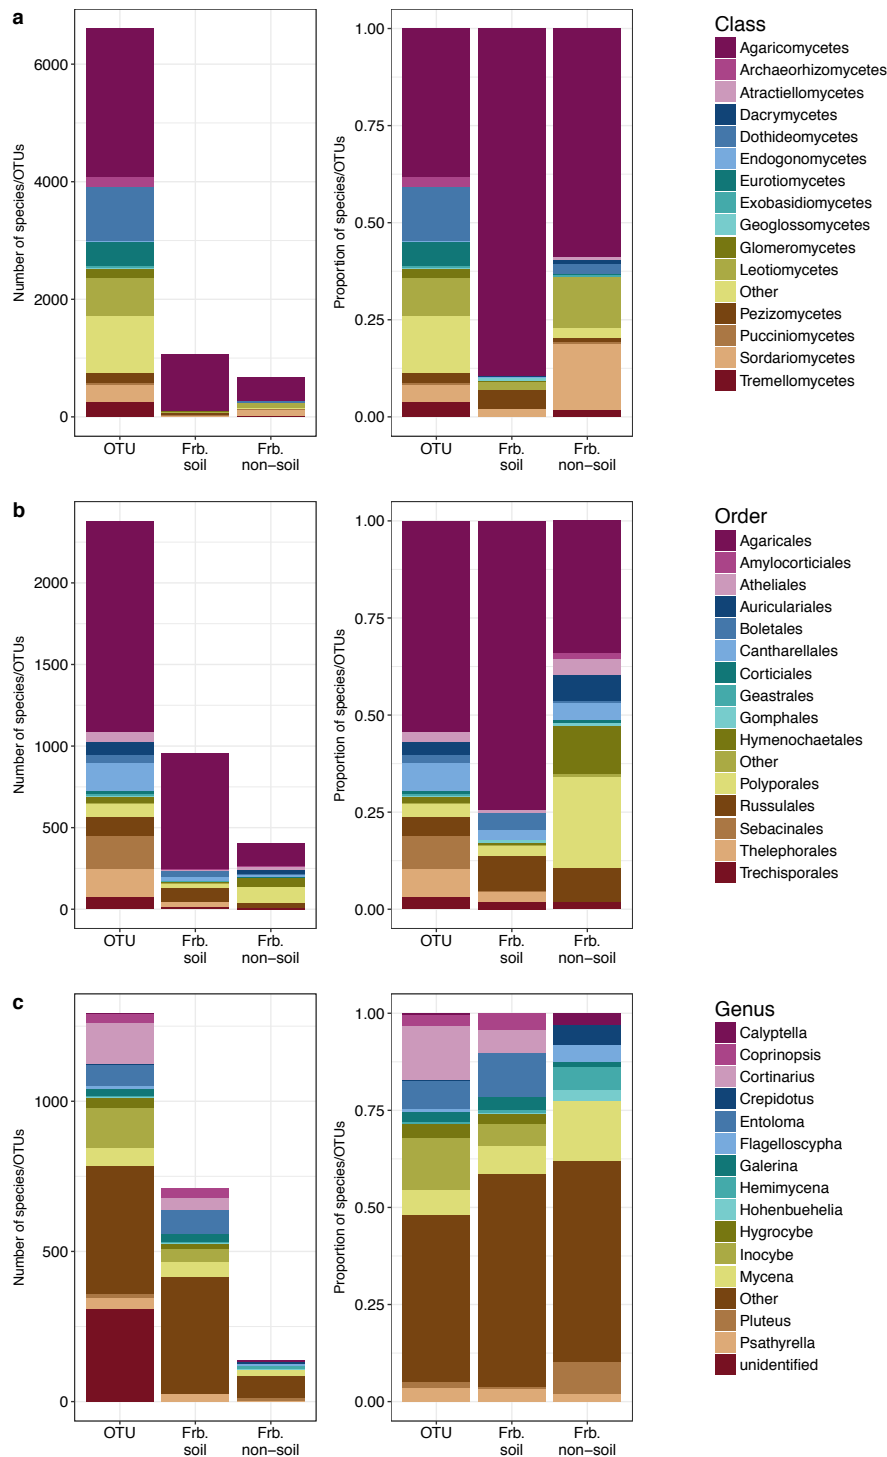

803

804 Figure 4. Taxonomic composition. Plots show the number of species (and OTUs) assigned to  
 805 higher taxa. Composition is shown for OTUs, fruitbody (soil) and fruitbody (non-soil). Left plot  
 806 in each panel shows the absolute richness (number of species) within different taxa, right plot  
 807 shows the relative richness. a) Number of species in each class for full datasets. b) Number  
 808 of species in each order in Agaricomycetes. c) Number of species in each genus of

809 Agaricales. Most frequent taxa for each dataset is shown for all datasets, the rest are pooled

810 in the category 'Other'.

811

812

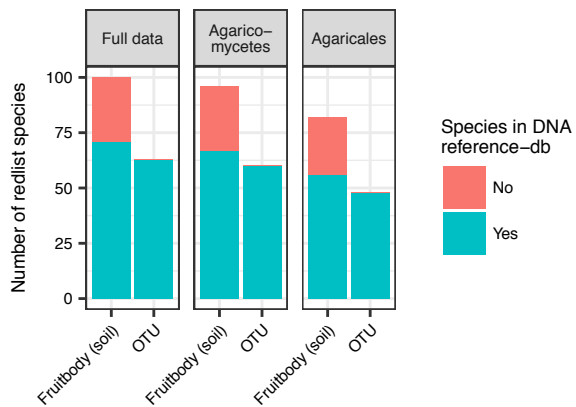

813

814 Figure 5. Number of red-listed species recorded. Total number of red-listed species found as  
815 fruitbodies (restricted to soil fungi), and OTUs. Taxa present in the DNA reference database  
816 (and thus possible to identify with both methods) are indicated in green, and taxa not present  
817 in the DNA reference database (and thus not possible to identify with DNA) are indicated in  
818 red.

819

820

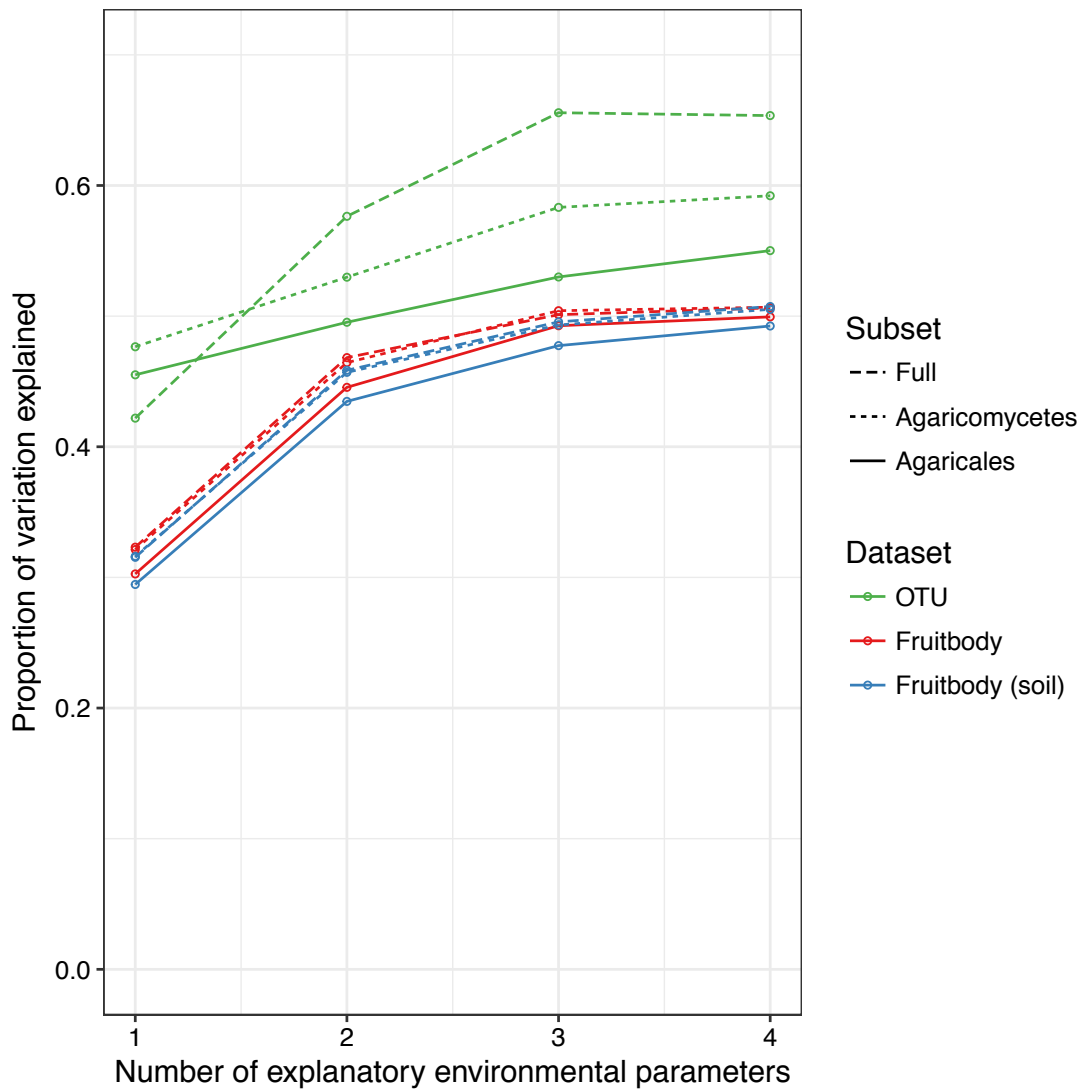

821

822 Figure 6. Proportion variation of community dissimilarity. X-axis shows the number of  
823 explanatory environmental variables selected by the model, and y-axis shows the total  
824 amount of explained variation. Colours indicate the dataset (OTU, fruitbody (all data) and  
825 fruitbody (soil species), line type indicates the three taxonomic subsets (All taxa,  
826 Agaricomycetes and Agaricales).
